# Supplementary material for: Decline in HIV Prevalence among Young Women in Zambia: National-Level Estimates of Trends Mask Geographical and Socio-Demographic Differences
Source: PLoS One. 2012 Apr 4;7(4):e33652. doi: 10.1371/journal.pone.0033652 (PMC3319534; doi:10.1371/journal.pone.0033652)
Supplement: Table S1 — Sensitivity Analysis. (XLS) [file pone.0033652.s001.xls]

## Sheet: Ark1
Sensitivity Analysis of HIV data
Urban Woman 2001/02							Urban Woman 2007
Estimated prevalence	Assumed prev. ratio refusers/ responders	% refusals	Assumed prev. ratio those absent/ responders	%absent	Adjusted prevalence		Estimated prevalence	Assumed prev. ratio refusers/ responders	% refusals	Assumed prev. ratio those absent/ responders	%absent	Adjusted prevalence
15.2	1.3	15.6	1.1	4.9	15.9858		11.1	1.3	20.6	1.1	3.9	11.8293
15.2	1.5	15.6	1.3	4.9	16.609		11.1	1.5	20.6	1.3	3.9	12.3732
15.2	2	15.6	1.5	4.9	17.9436		11.1	2	20.6	1.5	3.9	13.603
Rural Women 2001/02							Rural Woman 2007
Estimated prevalence	Assumed prev. ratio refusers/ responders	% refusals	Assumed prev. ratio those absent/ responders	%absent	Adjusted prevalence		Estimated prevalence	Assumed prev. ratio refusers/ responders	% refusals	Assumed prev. ratio those absent/ responders	%absent	Adjusted prevalence
7.8	1.3	15.7	1.1	5	8.20638		6.2	1.3	20.6	1.1	3.9	6.60734
7.8	1.5	15.7	1.3	5	8.5293		6.2	1.5	20.6	1.3	3.9	6.91114
7.8	2	15.7	1.5	5	9.2196		6.2	2	20.6	1.5	3.9	7.5981
Urban men 2001/02							Urban men 2007
Estimated prevalence	Assumed prev. ratio refusers/ responders	% refusals	Assumed prev. ratio those absent/ responders	%absent	Adjusted prevalence		Estimated prevalence	Assumed prev. ratio refusers/ responders	% refusals	Assumed prev. ratio those absent/ responders	%absent	Adjusted prevalence
3.7	1.3	16.2	1.1	17.3	3.94383		5.7	1.3	20.5	1.1	7.8	6.09501
3.7	1.5	16.2	1.3	17.3	4.19173		5.7	1.5	20.5	1.3	7.8	6.41763
3.7	2	16.2	1.5	17.3	4.61945		5.7	2	20.5	1.5	7.8	7.0908
Rural men 2001/02							Rural men 2007
Estimated prevalence	Assumed prev. ratio refusers/ responders	% refusals	Assumed prev. ratio those absent/ responders	%absent	Adjusted prevalence		Estimated prevalence	Assumed prev. ratio refusers/ responders	% refusals	Assumed prev. ratio those absent/ responders	%absent	Adjusted prevalence
3.1	1.3	14.3	1.1	8.9	3.26058		3	1.3	20.5	1.1	7.8	3.2079
3.1	1.5	14.3	1.3	8.9	3.40442		3	1.5	20.5	1.3	7.8	3.3777
3.1	2	14.3	1.5	8.9	3.68125		3	2	20.5	1.5	7.8	3.732

## Sheet: Ark2
12	3.7	28.3			21.1692
